# Supplementary material for: Electro-tuned catalysts: voltage-controlled activity selection of bimetallic exsolution particles
Source: Royal Society of Chemistry journal article supplement (doi:10.1039/d4ta00989d), 2024-01-01
Supplement: d4ta00989d1.pdf [file d4ta00989d1.pdf]

# Electro-Tuned Catalysts: Voltage-Controlled Activity Selection of Bimetallic Exsolution Particles

Harald Summerer<sup>1,2</sup>, Kirsten Rath<sup>1</sup>, Andreas Nenning<sup>1</sup>, Thomas Schachinger<sup>3,4</sup>, Michael, Stöger-Pollach<sup>3,4</sup>,  
Christoph Rameshan<sup>2,5</sup>, and Alexander K. Opitz<sup>1</sup>

<sup>1</sup>TU Wien, Institute of Chemical Technologies and Analytics, Getreidemarkt 9/164-EC, 1060 Vienna, Austria

<sup>2</sup>TU Wien, Institute of Materials Chemistry, Getreidemarkt 9/165-PC, 1060 Vienna, Austria

<sup>3</sup>TU Wien, Institute of Solid State Physics, 1040 Vienna, Austria

<sup>4</sup>TU Wien, University Service Centre for Transmission Electron Microscopy, 1040 Vienna, Austria

<sup>5</sup>Chair of Physical Chemistry, Montanuniversity Leoben, Leoben, 8700, Austria

June 21, 2024

## Supporting Information

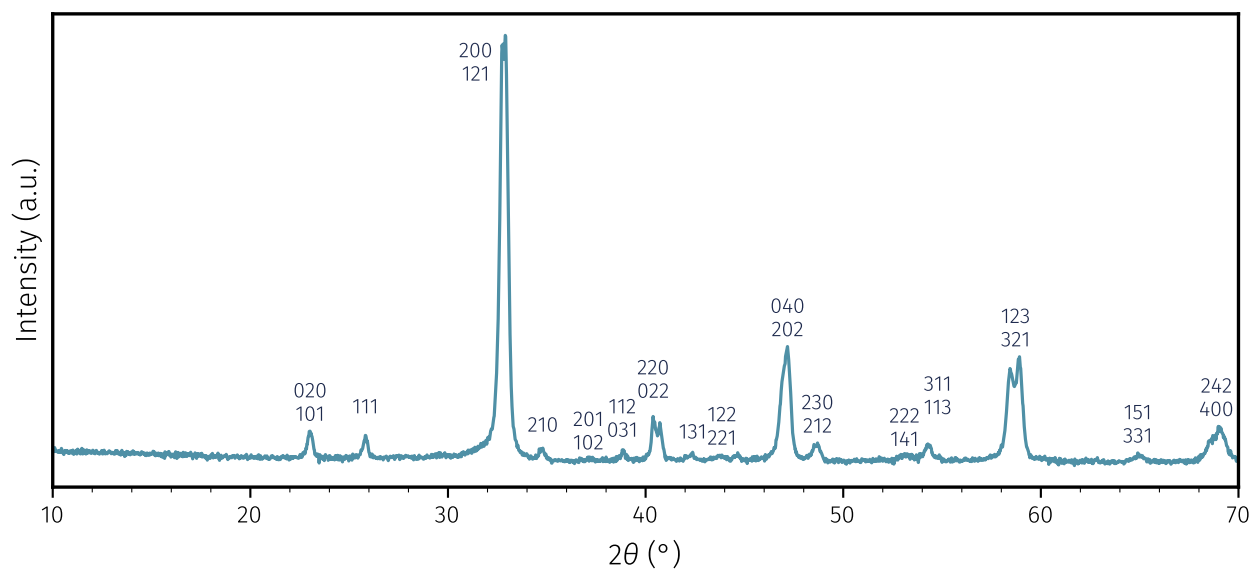

**FIGURE S1:** XRD pattern of the NCFNi target with (hkl) indices corresponding to orthorhombic, Pnma, space group # 62

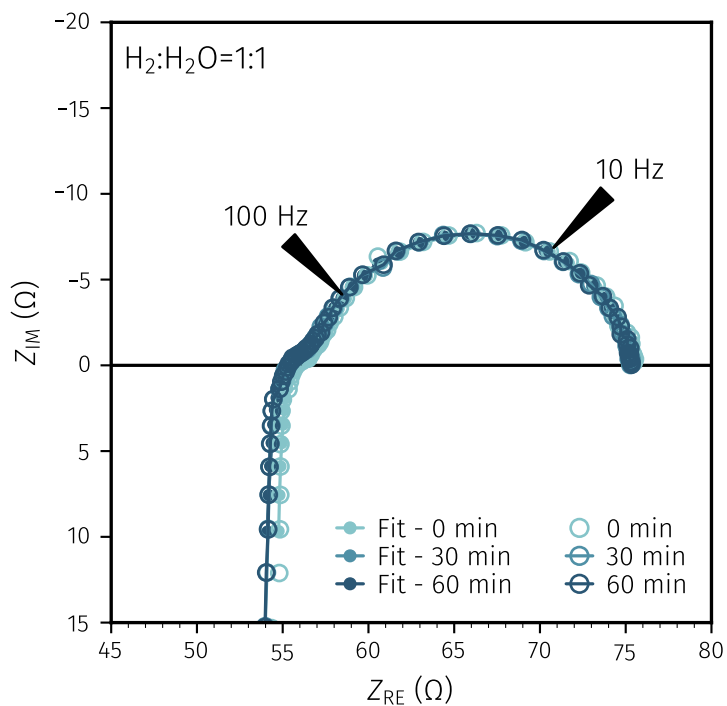

**FIGURE S2:** Exemplary impedance spectra of NCFNi at 600 °C in  $H_2:H_2O$  1:1 right after heating (0 min), in between (30 min) and at the end 60 min of the 1 h long equilibration period before the start of the DC measurements.

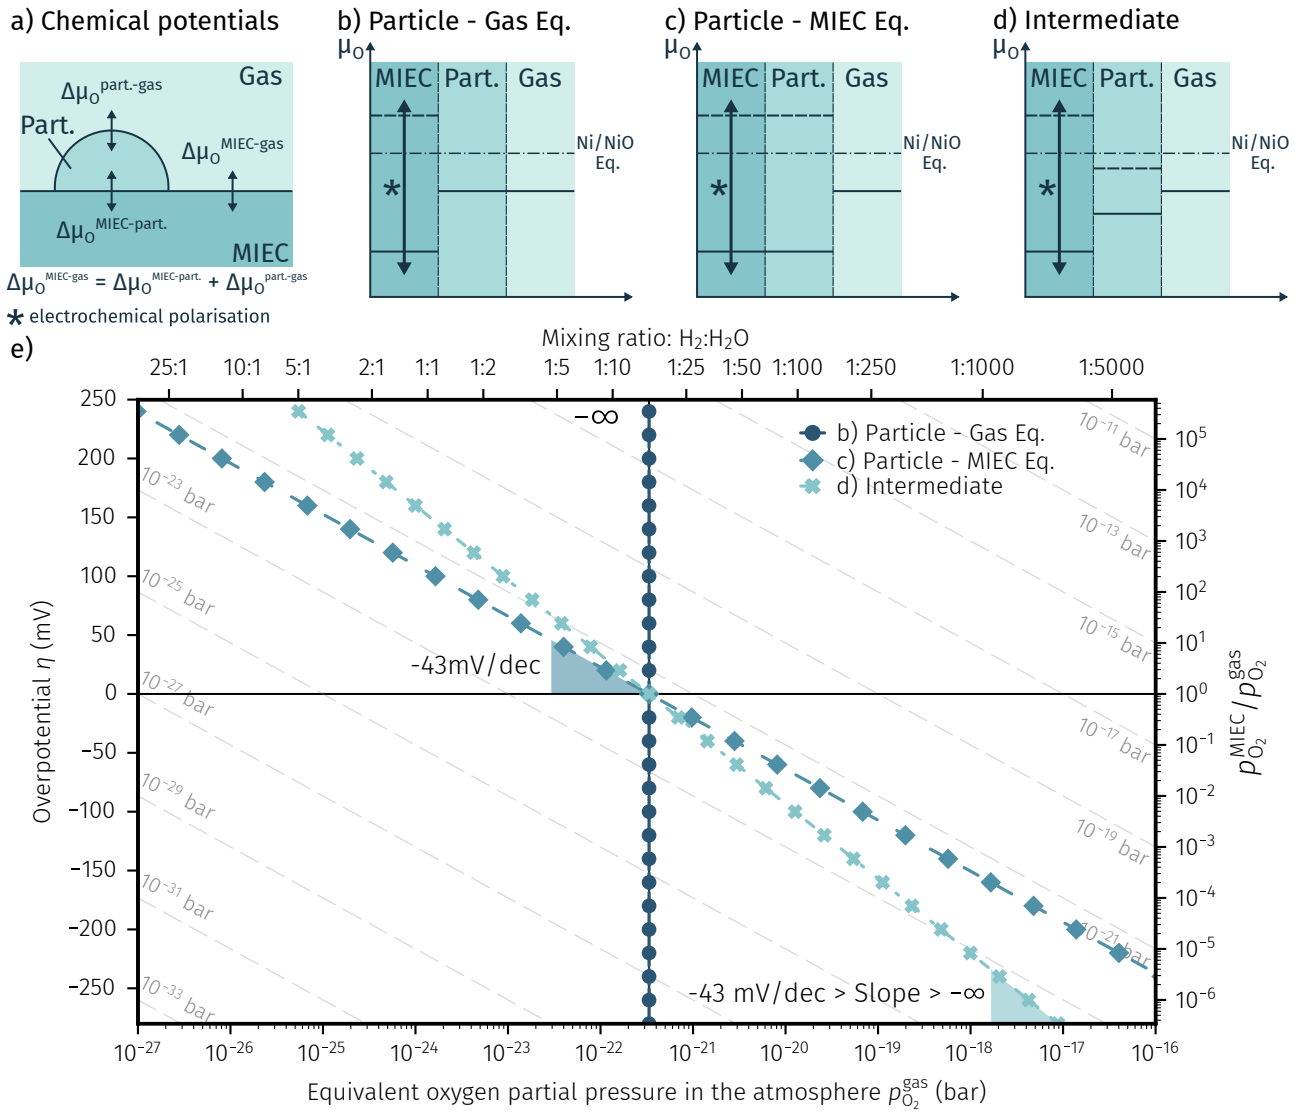

**FIGURE S3:** Adapted to Ni<sup>0</sup>/NiO from our previous study for Fe<sup>0</sup>/FeO<sup>1</sup>: a) Sketch of all gradients in the oxygen chemical potential  $\Delta\mu_{\text{O}}$  of the involved phases. b-d) Three different possibilities for the switching behaviour where either b)  $\Delta\mu_{\text{O}}^{\text{MIEC-gas}} \approx \Delta\mu_{\text{O}}^{\text{MIEC-part.}}$  or c)  $\Delta\mu_{\text{O}}^{\text{MIEC-gas}} \approx \Delta\mu_{\text{O}}^{\text{part.-gas}}$  applies as well as an d) intermediate one with both, MIEC and gas, affecting the particle. e) Resulting Ni/NiO equilibria for all three cases shown in a semilogarithmic plot of the overpotential  $\eta$  at the working electrode versus the equivalent oxygen partial pressure  $p_{\text{O}_2}^{\text{gas}}$  in the atmosphere. The dashed lines represent the isobars of  $p_{\text{O}_2}^{\text{MIEC}}$ .

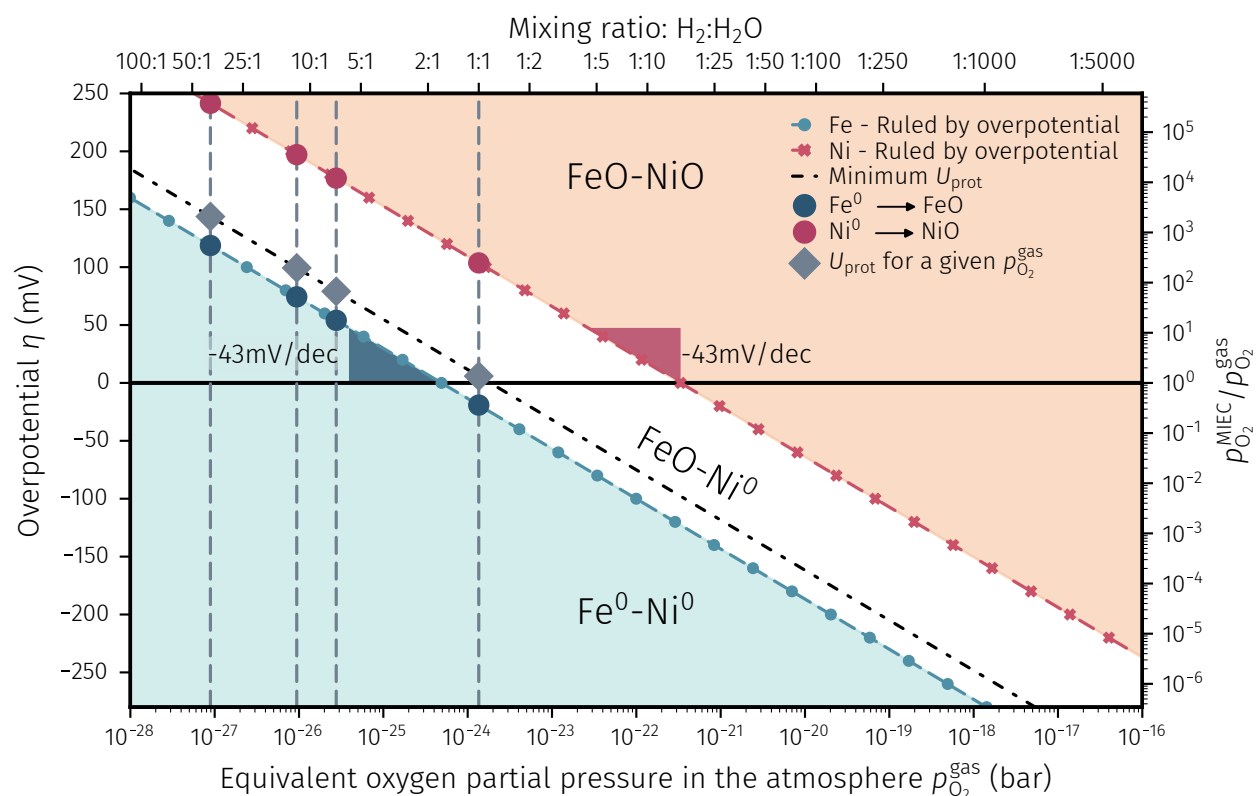

**FIGURE S4:** Semilogarithmic of the overpotential  $\eta$  at the working electrode versus the equivalent oxygen partial pressure  $p_{\text{O}_2}^{\text{gas}}$  in the atmosphere. If the oxidation state of exsolved iron and nickel particles is mainly governed by the electrochemical reaction, it is possible to distinguish between three distinct segments:  $\text{Fe}^0\text{-Ni}^0$  (light teal),  $\text{FeO-Ni}^0$  (white) and  $\text{FeO-NiO}$  (orange). The corresponding working atmospheres in Fig. 4 are depicted as grey dashed lines and the dark teal/red dots mark the overpotential values where iron/nickel metal transition to their respective oxides. The protection voltage  $U_{\text{prot}}$  for a given atmosphere (grey diamonds) was chosen by shifting the  $\text{Fe}^0\text{-FeO}$  equilibrium line 25 mV up (dot-dashed black line) and thus preventing  $\text{Fe}^0$  from ever being the more stable surface state.

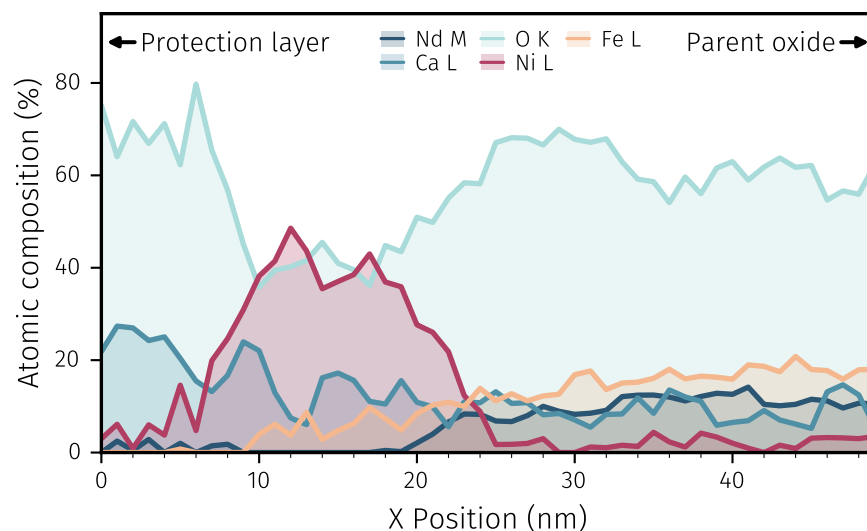

**FIGURE S5:** Atomic compositions of all main components (Nd, O, Ca, Ni, Fe) as determined by an EELS line scan of a pristine *in situ* sample ranging from the protective layer through the surface particle to the parent oxide. A clear accumulation of Ni between 6 nm and 24 nm is recognisable.

## References

- (1) H. Summerer, A. Nenning, C. Rameshan and A. K. Opitz, *EES Catalysis*, 2023, **1**, 274–289.
